# Supplementary material
Source: publisher site journal article supplement (https://www.dovepress.com/article/240769)
Supplement: Supplementary file 1 [file get_supplementary_file.php]

Table S1. Correlation of NEAT1 expression and clinicopathological features in breast cancer

| **Variables** | **NEAT1 expression** | | | **p value** |
| --- | --- | --- | --- | --- |
| **All cases**  **(n=106)** | **Low expression**  **(n=50)** | **High**  **Expression**  **(n=56)** |
| **Age (years)**  ≤ 50  > 50  **Clinical stage**  I & II  III & IV  **Lymph node metastasis**  Positive  Negative  **ER**  Positive  Negative  **PR**  Positive  Negative  **HER2**  Positive  Negative | 55  51  32  74  68  38  43  63  56  50  63  43 | 29  21  22  28  44  6  20  30  29  22  31  19 | 26  30  10  46  24  32  23  33  27  28  32  24 | 0.234  **0.003****  **0.001****  0.911  0.423  0.611 |

*****p*<0.01**

Table S2. Univariate and multivariate cox proportional hazard regression analysis.

| **Variables** | **Univariate analysis** | | | **Multivariate analysis** | | |
| --- | --- | --- | --- | --- | --- | --- |
| **HR** | **95% CI** | **P-value** | **HR** | **95% CI** | **P-value** |
| **Age (years)**  (≤ 50 VS > 50)  **Clinical stage**  (I&II VS III&IV)  **Lymph node metastasis**  (Positive VS Negative)  **ER**  (Positive VS Negative)  **PR**  (Positive VS Negative)  **HER2**  (Positive VS Negative)  **NEAT1 expression**  (High vs Low) | 0.738  6.723  8.731  0.921  0.856  0.506  6.357 | 0.738-3.042  3.136-14.145  3.742-20.371  0.447-1.898  0.420-1.746  0.249-1.027  2.431-16.718 | 0.263  **0.001**  **0.001**  0.823  0.670  0.590  **0.001** | - - -  1.854  3.990  - - -  - - -  - - -  3.042 | - - -  0.672-5.109  1.316-12.091  - - -  - - -  - - -  1.034-8.950 | - - -  0.233  **0.014***  - - -  - - -  - - -  **0.043*** |

**p*<0.05
